# Supplementary material for: Diaphite: diamond-graphene hybrid nanostructures grown in CH4/H2/N2 chemistry
Source: Research Square preprint supplement (doi:10.21203/rs.3.rs-4325983/v1), 2024-05-14
Supplement: Supplementary file 1 [file 157d4e4caf54adb687233818.pdf]

# Diaphite: diamond-graphene hybrid nanostructures grown in CH<sub>4</sub>/H<sub>2</sub>/N<sub>2</sub> chemistry

Venkateswara Rao Sodisetti<sup>1</sup> and Somnath Bhattacharyya<sup>1,2,\*</sup>

<sup>1</sup>Nano-Scale Transport Physics Laboratory, School of Physics, University of the Witwatersrand, Johannesburg WITS 2050, South Africa

<sup>2</sup>DSI-NRF Centre of Excellence in Strong Materials and School of Physics, University of the Witwatersrand, Johannesburg WITS 2050, South Africa

\*somnath.bhattacharyya@wits.ac.za

## ABSTRACT

## Supplementary Information

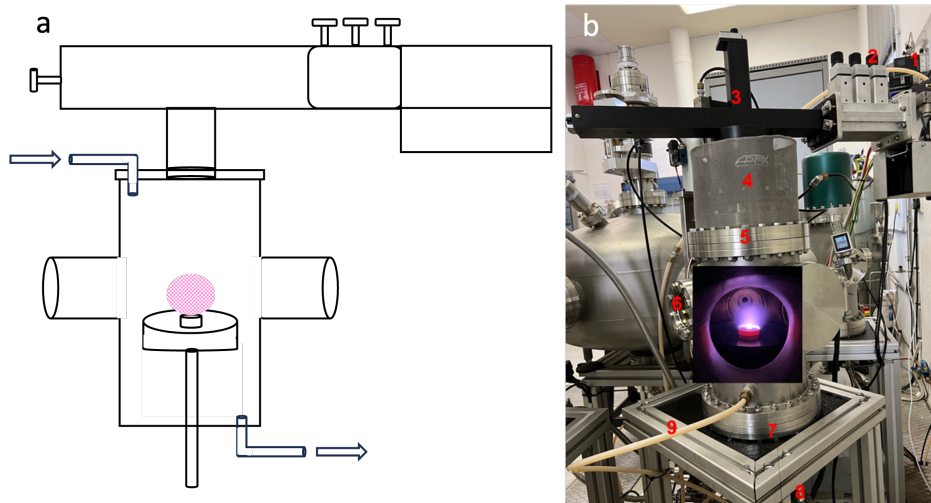

**Figure 1.** Custom-built MPECVD reactor at NSTPL: a) Schematic picture of self-assembled MPECVD system. b) MPECVD with different parts including a (1) MKS solid state Microwave generator, (2) Sub tuner, (3) Waveguide with applicator, (4) antenna connecting the waveguide and CVD chamber, (5) a transparent quartz window is placed between the antenna and the CVD chamber, (6) CVD main chamber with substrate stage and holder, (7) Stage height adjuster, (8) Vacuum line, and (9) Water circulation line.

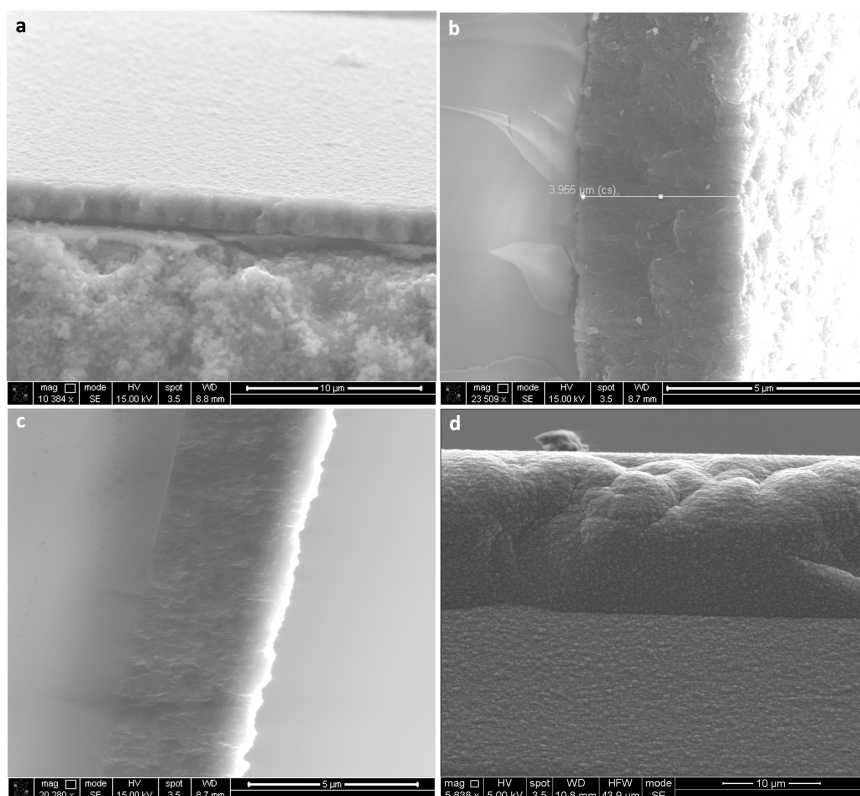

**Figure 2.** Cross sectional images of  $N_2$  doped UNCD samples. a) UNCD<sub>5</sub> of film thickness  $3.5 \pm 0.1 \mu\text{m}$ . b) UNCD<sub>10</sub> of film thickness  $3.9 \pm 0.1 \mu\text{m}$ . c) UNCD<sub>15</sub> of film thickness  $5.2 \pm 0.2 \mu\text{m}$ . d) UNCD<sub>20</sub> of film thickness  $7.1 \pm 0.2 \mu\text{m}$ .

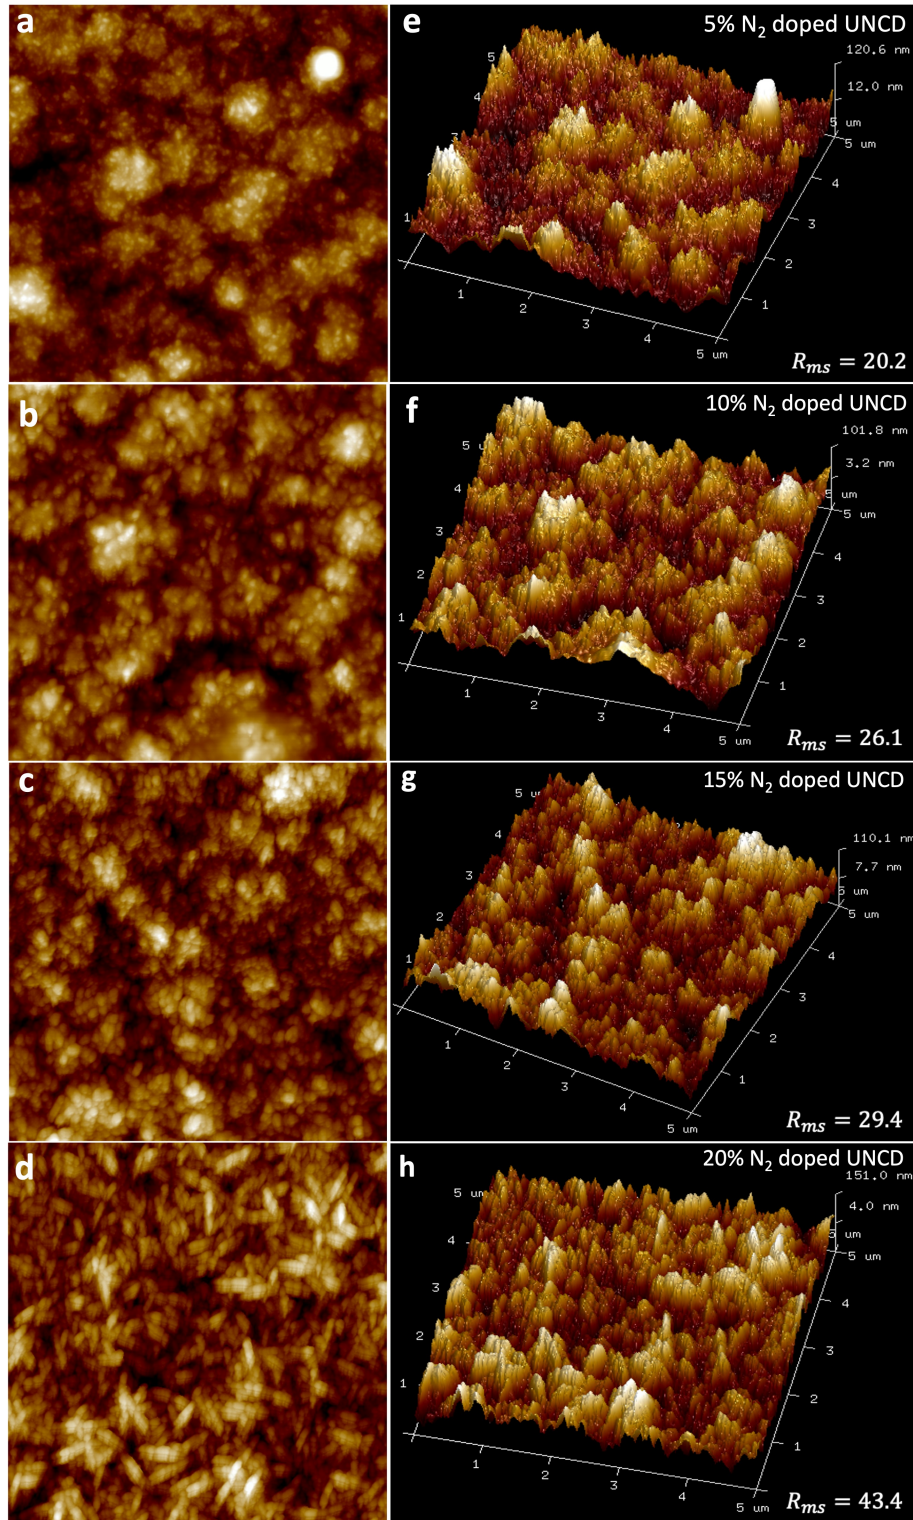

**Figure 3.** Atomic Force Microscopy (AFM) investigation of UNCD as a function of N<sub>2</sub> doping. a, b, c, and d) AFM height sensor non-contact mode imaging of 5%, 10%, 15% and 20% N<sub>2</sub> doped UNCD samples. e, f, g, and h) are the 3 D mapping of the surface terrain of the respective samples. It can be noted that  $R_{ms}$  values increase as the N<sub>2</sub> doping is increased.

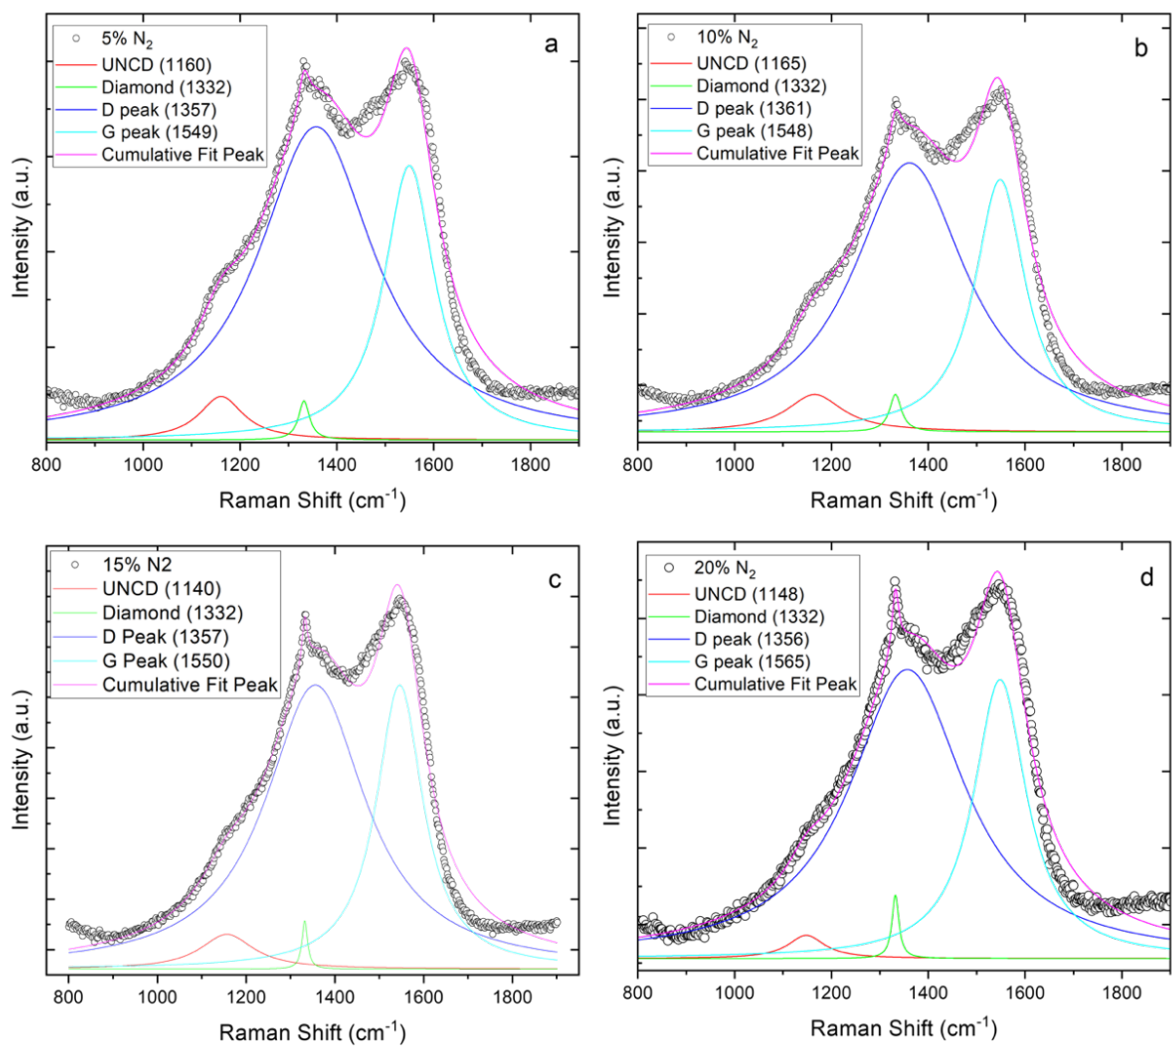

**Figure 4.** Deconvoluted Raman Spectra of UNCD samples with varied  $N_2$  concentration. a) UNCD<sub>5</sub>, b) UNCD<sub>10</sub>, c) UNCD<sub>15</sub>, and d) UNCD<sub>20</sub> sample.



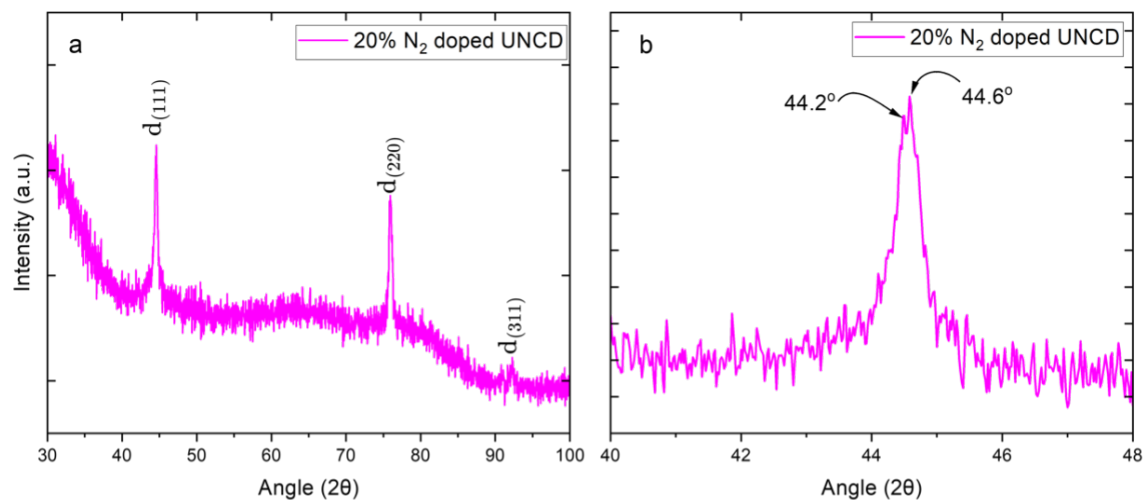

**Figure 5.** XRD plot of UNCD<sub>20</sub>. a) Commonly observed d<sub>(111)</sub>, d<sub>(220)</sub> and d<sub>(311)</sub> diffraction associated with d spacing 0.206 nm, 0.126 nm and 0.107 nm respectively. b) The d<sub>(111)</sub> peak for UNCD<sub>20</sub> shift to higher Bragg's angle compared to UNCD<sub>5</sub> and UNCD<sub>10</sub> samples.

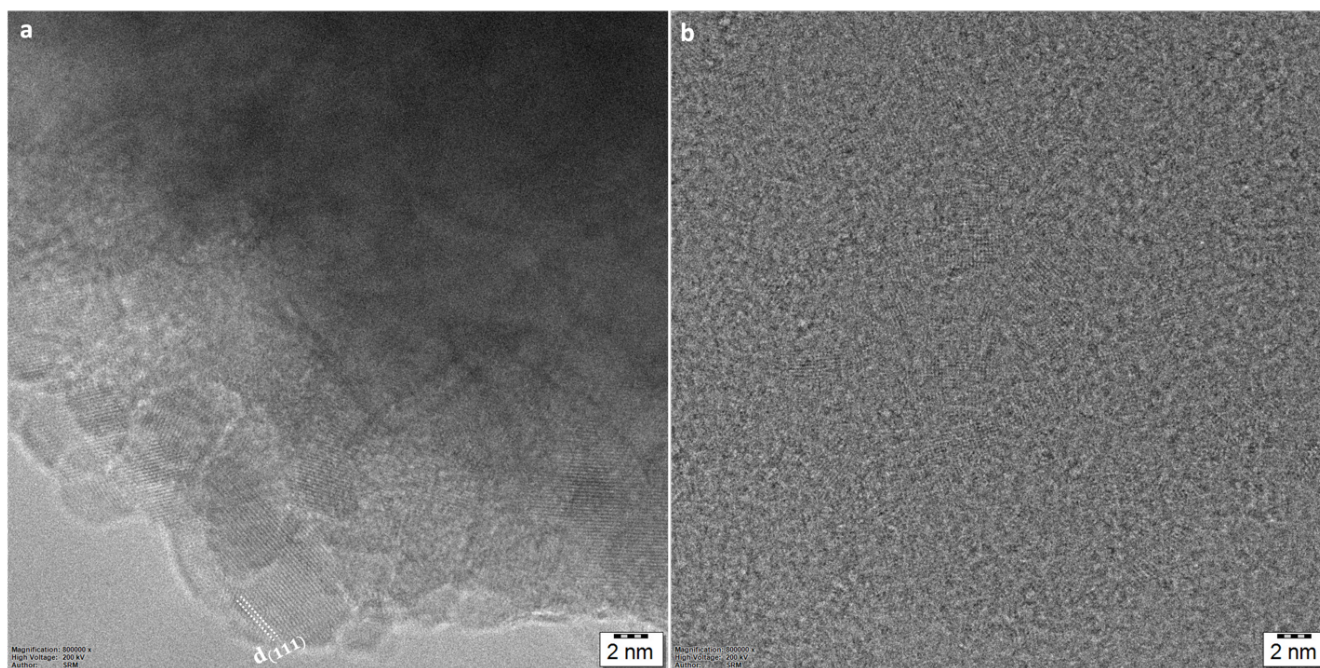

**Figure 6.** HR-TEM image of UNCD with no doping. a and b) nanodiamond display only {111} fringes associated with cubic diamond.
